# Supplementary material for: Contraindications to the Initiation of Veno-Venous ECMO for Severe Acute Respiratory Failure in Adults: A Systematic Review and Practical Approach Based on the Current Literature
Source: MDPI journal article supplement (doi:10.3390/membranes11080584), 2021-07-30
Supplement: s1 [file s1]

# Contraindications to the Initiation of Veno-Venous ECMO for Severe Acute Respiratory Failure in Adults: A Systematic Review and Practical Approach Based on the Current Literature

Lars-Olav Harnisch \* and Onnen Moerer

Department of Anesthesiology, University Medical Center, University of Goettingen, 37075 Göttingen, Germany; [omoerer@med.uni-goettingen.de](mailto:omoerer@med.uni-goettingen.de)

\* Correspondence: [lars-olav.harnisch@med.uni-goettingen.de](mailto:lars-olav.harnisch@med.uni-goettingen.de)

**Table S1.** Evidence for the differences in SAPS II scores between the groups of survivors and non-survivors. Score values are absolute values, p-value as extracted from the respective trial. The cumulative mean value was not statistically significant between the two groups (Fishers' exact test).

| Study                    | SAPS II Score<br>Survivors | SAPS II Score<br>Nonsurvivors | p-value |
|--------------------------|----------------------------|-------------------------------|---------|
| Beiderlinden et al. 2006 | 44                         | 48                            | 0.001   |
| Schmidt et al. 2013      | 57                         | 64                            | 0.04    |
| Wohlfahrt et al. 2014    | 56                         | 45                            | 0.90    |
| Klinzing et al. 2015     | 43                         | 51                            | 0.09    |
| Lee et al. 2016          | 50.35                      | 68.7                          | 0.0000  |
| Choi et al. 2017         | 73                         | 94                            | 0.008   |
| Wohlfahrt et al. 2017    | 56                         | 55                            | 0.61    |
| Hilder et al. 2017       | 60                         | 65                            | 0.009   |
| Stecher et al. 2018      | 62                         | 69                            | 0.27    |
| Cho et al. 2019          | 54                         | 67                            | 0.043   |
| Park et al. 2021         | 42                         | 52.2                          | 0.565   |
| Supady et al. 2021       | 34                         | 38.5                          | 0.042   |
| Fisser et al. 2021       | 61                         | 64                            | <0.001  |
| Giraud et al. 2021       | 56                         | 60                            | NS      |
| Mean                     | 53.16                      | 59.49                         | 1.0     |

**Table S2.** Evidence for the differences in SOFA scores between the groups of survivors and non-survivors. Score values are absolute values, p-value as extracted from the respective trial. The cumulative mean value was not statistically significant between the two groups (Fishers' exact test).

| Study                    | SOFA (mSOFA) Score | SOFA (mSOFA) Score | p-value |
|--------------------------|--------------------|--------------------|---------|
|                          | Survivors          | Nonsurvivors       |         |
| Beiderlinden et al. 2006 | 11 (7)             | 12 (8)             | 0.15    |
| Arlt et al. 2010         | 12 (8)             | 12 (8)             | n/a     |
| Patroniti et al. 2011    | 7 (3)              | 10 (6)             | <0.05   |
| Schmidt et al. 2013      | 12 (8)             | 13 (9)             | 0.13    |
| Enger et al. 2014        | 11 (7)             | 13 (9)             | 0.001   |
| Wohlfahrt et al. 2014    | 12 (8)             | 12 (8)             | 0.79    |
| Klinzing et al. 2015     | 11 (7)             | 12 (8)             | 0.09    |
| Cheng et al. 2016/2      | 9 (5)              | 10 (6)             | 0.004   |
| Choi et al. 2016         | 10 (6)             | 12 (8)             | 0.049   |
| Lee et al. 2016          | 11 (7)             | 13 (9)             | 0.031   |
| Serpa Neto et al. 2016   | 10.2 (6.2)         | 11.6 (7.6)         | 0.002   |
| Wu et al. 2016           | 10 (6)             | 12 (8)             | 0.044   |
| Hilder et al. 2017       | 13 (9)             | 15 (11)            | <0.001  |
| Hsin et al. 2016         | 9 (5)              | 10 (6)             | 0.005   |
| Huang et al. 2016        | 10 (6)             | 12 (8)             | 0.238   |
| Choi et al. 2017         | 14 (10)            | 17 (13)            | 0.022   |
| Wu et al. 2017           | 9 (5)              | 10 (6)             | 0.002   |
| Schmidt et al. 2018      | 13 (9)             | 13 (9)             | 0.83    |
| Stecher et al. 2018      | 15 (11)            | 15 (11)            | 0.44    |
| Cho et al. 2019          | 14 (10)            | 15 (11)            | 0.278   |
| Park et al. 2021         | 9 (5)              | 12 (8)             | <0.001  |
| Supady et al. 2021       | 9 (5)              | 9 (5)              | 0.045   |
| Fisser et al. 2021       | 12 (8)             | 13 (9)             | 0.011   |
| Dreier et al. 2021       | 10 (6)             | 12 (8)             | 0.039   |
| Mean                     | 10.79 (6.79)       | 12.20 (8.20)       | 0.004   |

**Table S3.** Evidence for the differences in PRESERVE scores between the groups of survivors and non-survivors. Score values are absolute values, p-value as extracted from the respective trial. The cumulative mean value was not statistically significant between the two groups (Fishers' exact test).

| Study                       | PRESERVE Score | PRESERVE Score | p-value |
|-----------------------------|----------------|----------------|---------|
|                             | Survivors      | Nonsurvivors   |         |
| Hilder et al. 2017          | 4              | 5              | 0.106   |
| Kang et al. 2017 (hospital) | 5.6            | 6.9            | 0.021   |
| Kang et al. 2017 (6 months) | 5.4            | 7.0            | 0.007   |
| Schmidt et al. 2018         | 6              | 8              | 0.001   |
| Supady et al. 2021          | 4              | 3              | 0.389   |
| Fisser et al. 2021          | 3              | 4              | <0.001  |
| Dreier et al. 2021          | 4              | 4              | 1.0     |
| Mean                        | 4.6            | 5.4            | 1.0     |

**Table S4.** Evidence for the differences in RESP scores between the groups of survivors and non-survivors. Score values are absolute values, p-value as extracted from the respective trial. The cumulative mean value was not statistically significant between the two groups (Fishers' exact test).

| <b>Study</b>                | <b>RESP Score<br/>Survivors</b> | <b>RESP Score<br/>Nonsurvivors</b> | <b>p-value</b> |
|-----------------------------|---------------------------------|------------------------------------|----------------|
| Cheng et al. 2016           | 2                               | 0                                  | <0.001         |
| Choi et al. 2016            | 1.31                            | -1.07                              | 0.02           |
| Hsin et al. 2016            | 2                               | -1                                 | 0.004          |
| Wu et al. 2016              | 1                               | 1                                  | 0.058          |
| Hilder et al. 2017          | 1                               | -2                                 | 0.012          |
| Kang et al. 2017 (hospital) | 0.5                             | -2                                 | 0.004          |
| Kang et al. 2017 (6 months) | 0.5                             | -2                                 | 0.005          |
| Wu et al. 2017              | 2                               | 1                                  | 0.05           |
| Schmidt et al. 2018         | 1                               | -1                                 | 0.002          |
| Cho et al. 2019             | 2                               | 1                                  | 0.703          |
| Posluszny et al. 2020       | -0.31                           | -0.83                              | <0.001         |
| Supady et al. 2021          | 1                               | 2                                  | 0.051          |
| Fisser et al. 2021          | 0                               | -1                                 | 0.008          |
| Mean                        | 1.08                            | -0.45                              | 0.432          |
